# Supplementary material for: Impact of Sowing Time on Chickpea (Cicer arietinum L.) Biomass Accumulation and Yield
Source: MDPI journal article supplement (doi:10.3390/agronomy12010160), 2022-01-10
Supplement: s1 [file s1]

Trangie Agricultural Station climate 2018 (Supplementary Figure S1a)

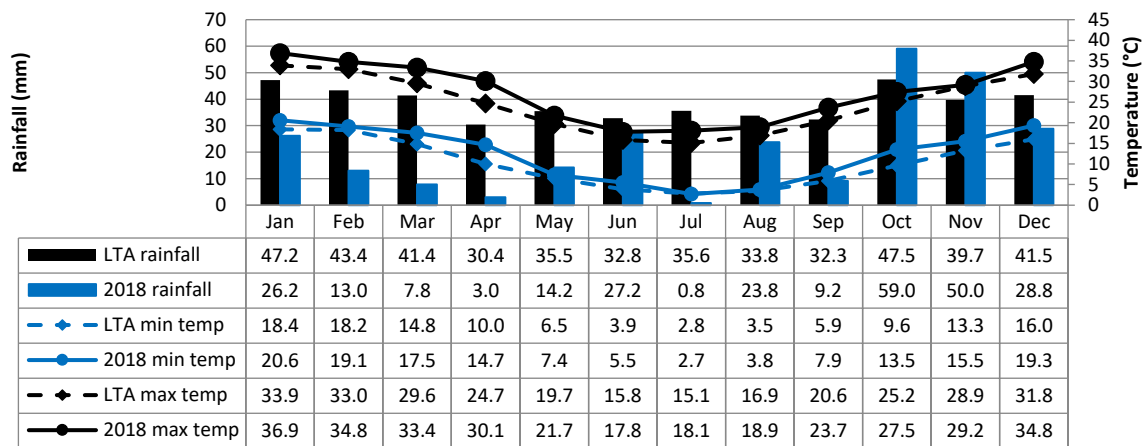

Trangie Agricultural Research Centre climate 2019 (Supplementary Figure S1b)

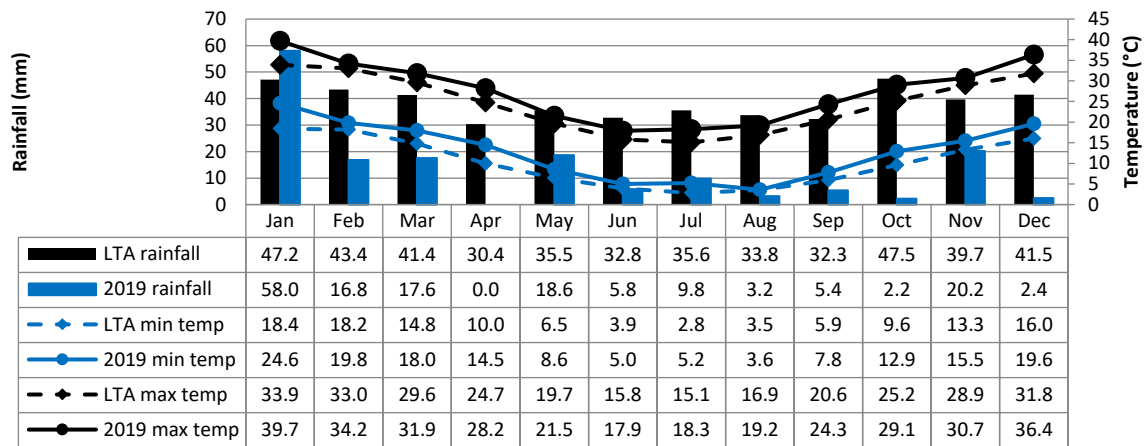

Wagga Wagga Agricultural Institute climate 2018 (Supplementary Figure S1c)

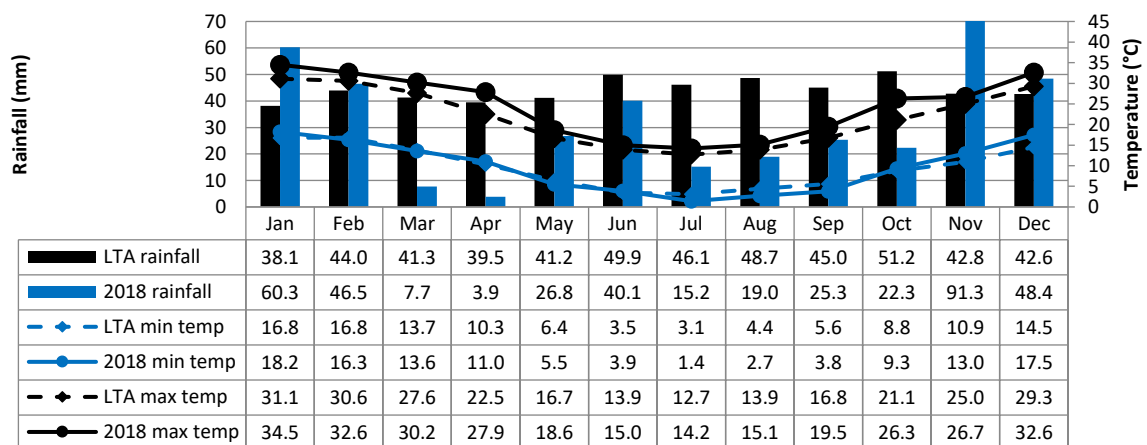

**Wagga Wagga Agricultural Institute climate 2019 (Supplementary Figure S1d)**

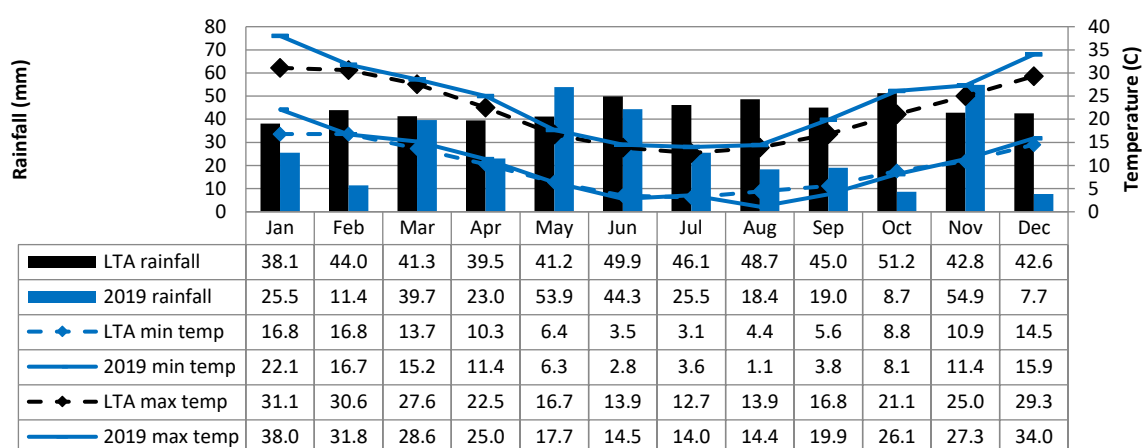

**Leeton Field Station and Yanco Agricultural Institute climate 2018 (Supplementary Figure S1e)**

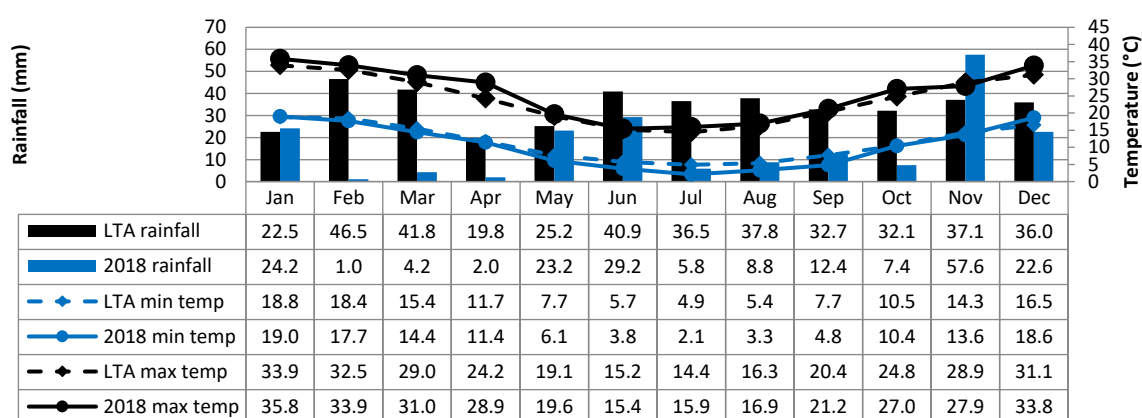

**Leeton Field Station climate 2019 (Supplementary Figure S1f)**

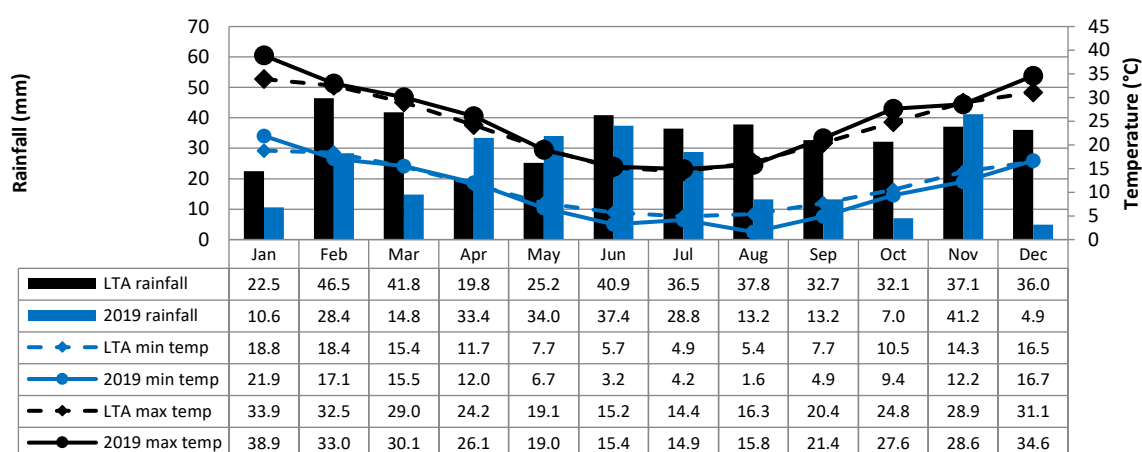

**Supplementary Figure S1a–f.** Rainfall, minimum (min) and maximum (max) temperatures recorded in 2018 and 2019, at TARC, WWAI, LFS and YAI. TARC = Trangie Agricultural Research Centre; WWAI = Wagga Wagga Agricultural Institute; LFS = Leeton Field Station 2018 experiment; YAI = Yanco Agricultural Institute.
